# Supplementary material for: Long-Term Disease Dynamics for a Specialized Parasite of Ant Societies: A Field Study
Source: PubMed Central journal article supplement (PMC4136743; doi:10.1371/journal.pone.0103516), 2014-08-18

### Inside nest experiment data

Smaples 1-14: nest with live ants. Samples 15-28: nest without live ants (only nest material)

Sample 2 - before

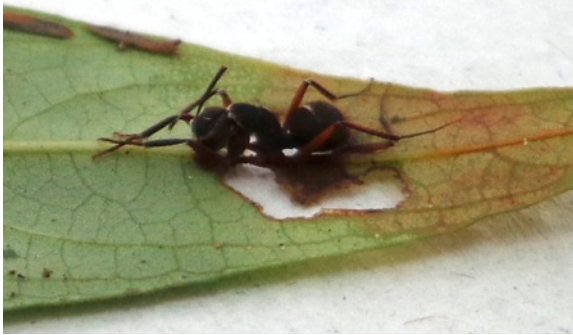

Sample 2 - after

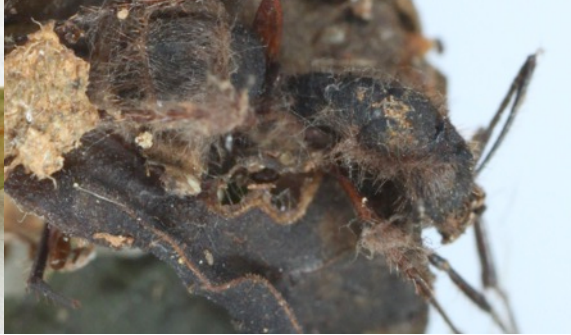

Sample 5 - before

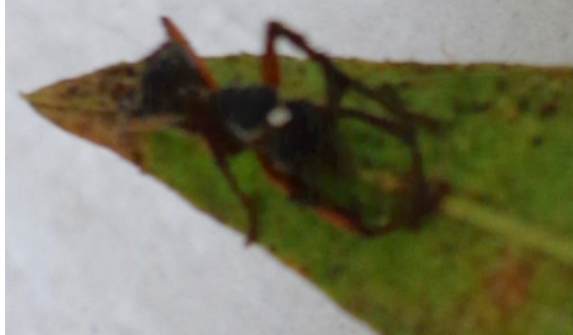

Sample 5 - after

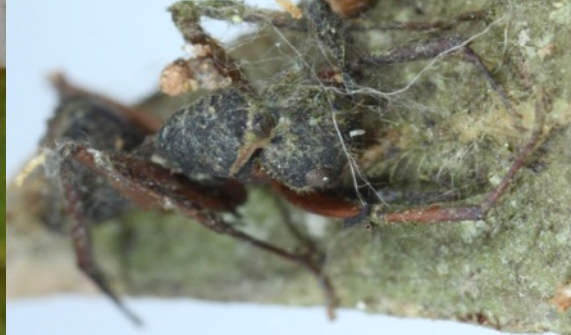

Sample 6 - before

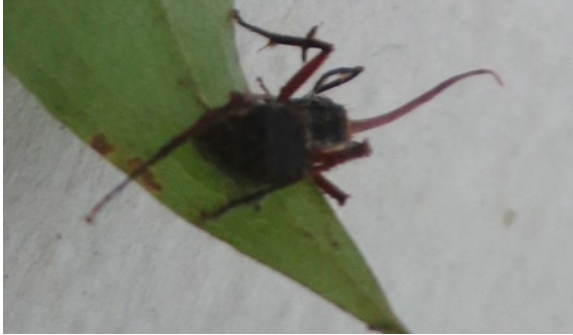

Sample 6 - after

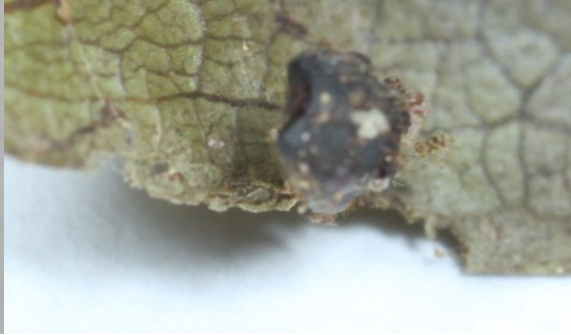

Sample 9 - before

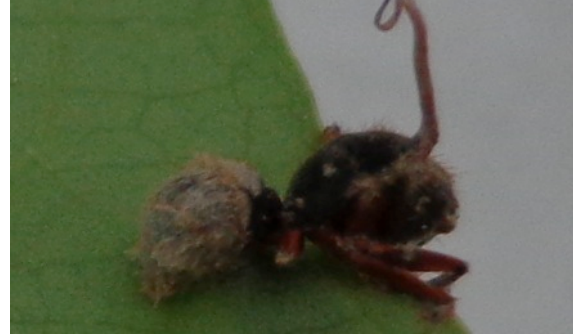

Sample 9 - after

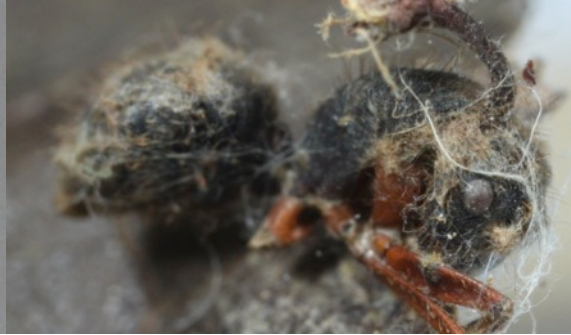

Sample 10 - before

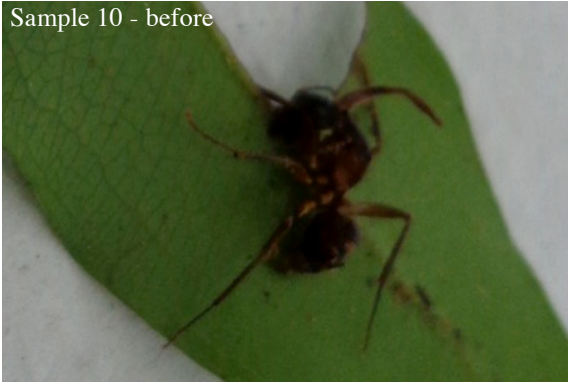

Sample 10 - after

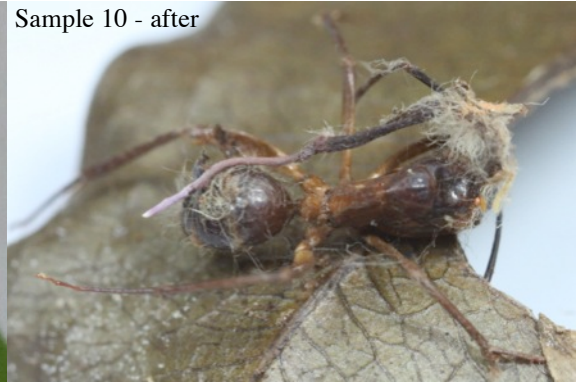

Sample 12 - before

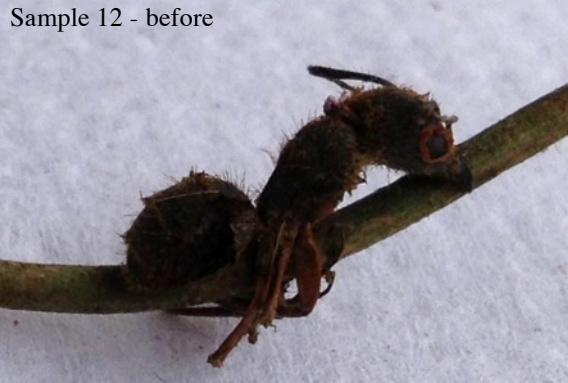

Sample 12 - after

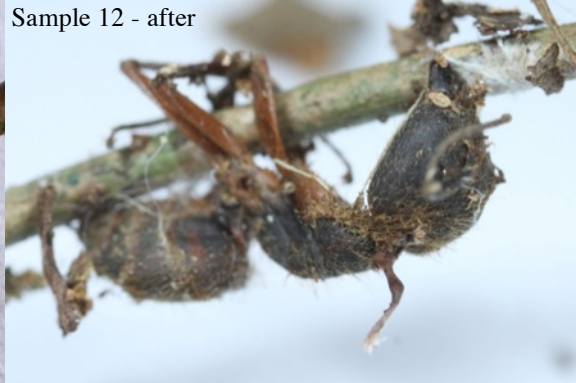

Sample 15 - before

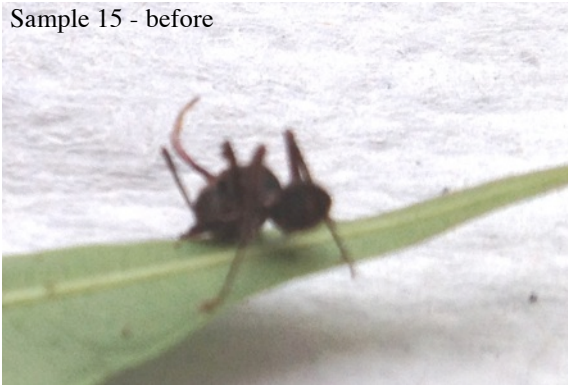

Sample 15 - after

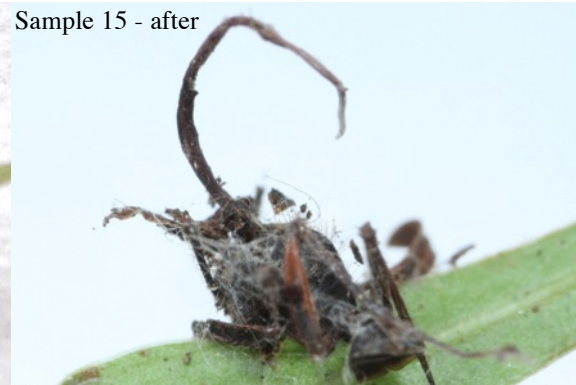

Sample 16 - before

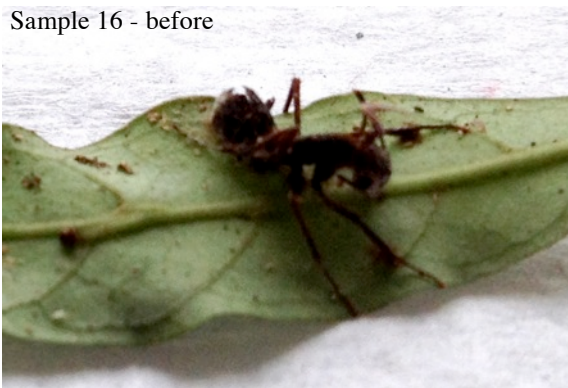

Sample 16 - after

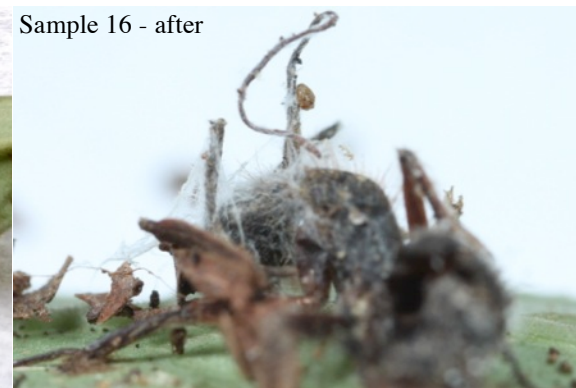

Sample 17 - before

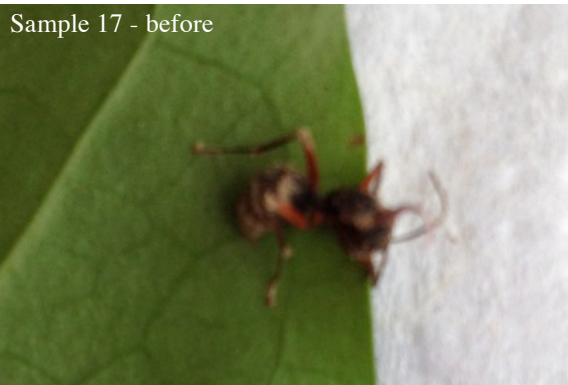

Sample 17 - after

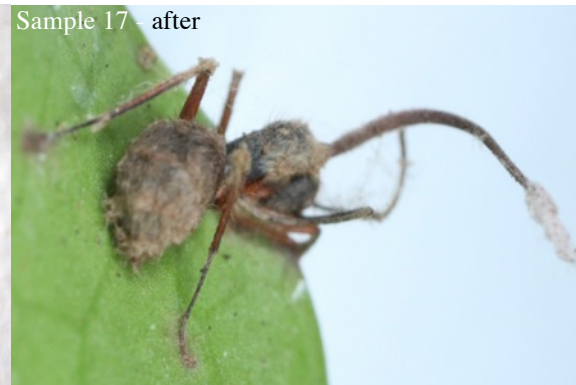

Sample 18 - before

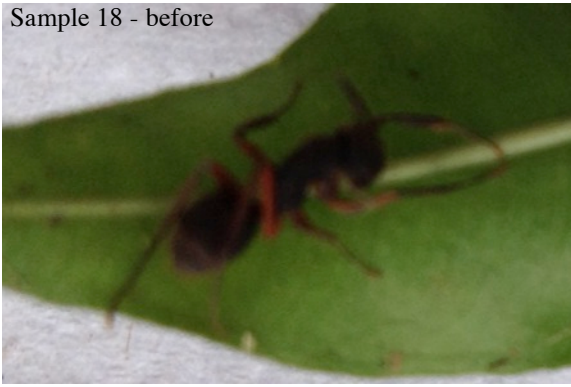

Sample 18 - after

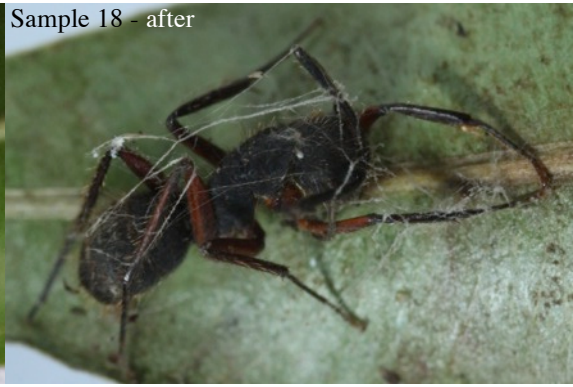

Sample 19 - before

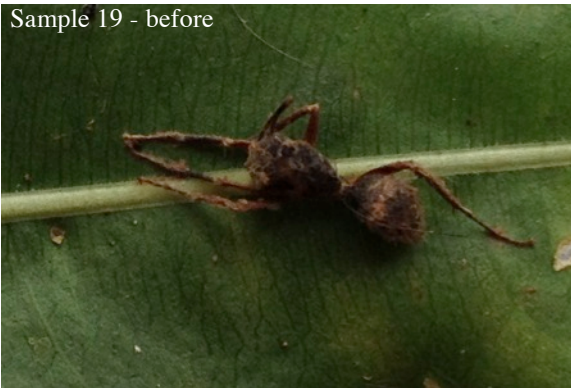

Sample 19 - after

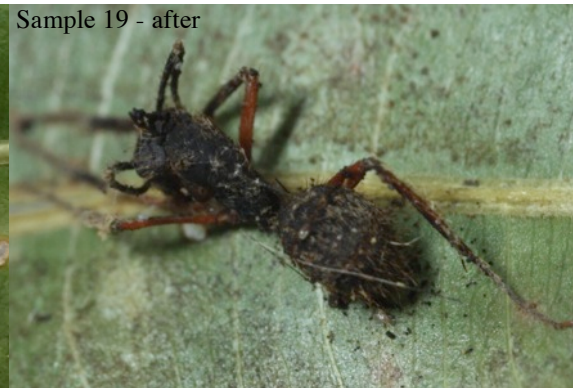

Sample 20 - before

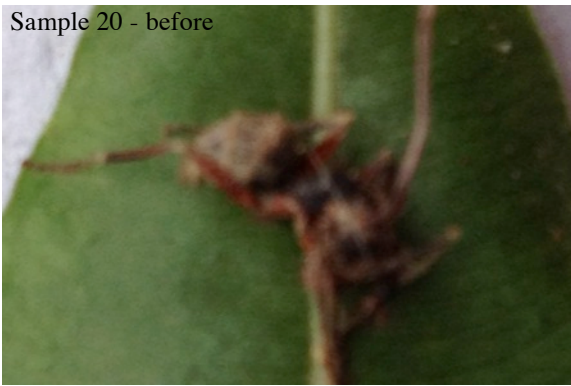

Sample 20 - after

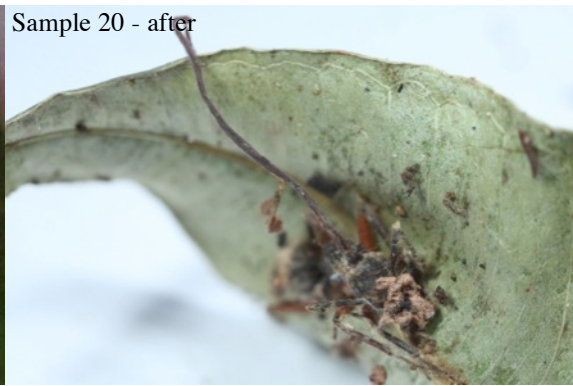

Sample 21 - before

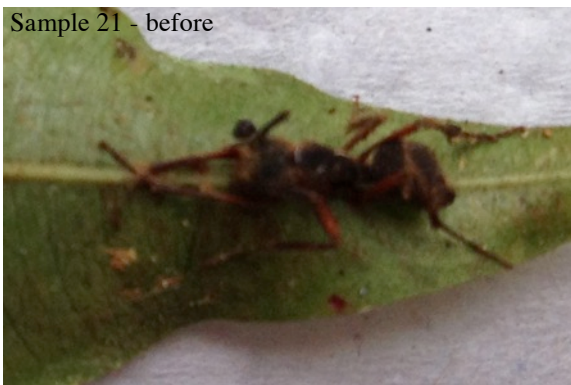

Sample 21 - after

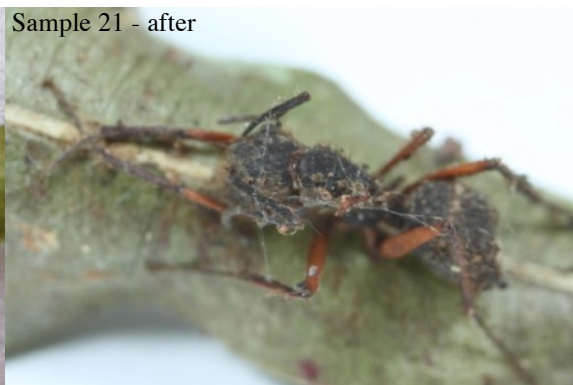

Sample 22 - before

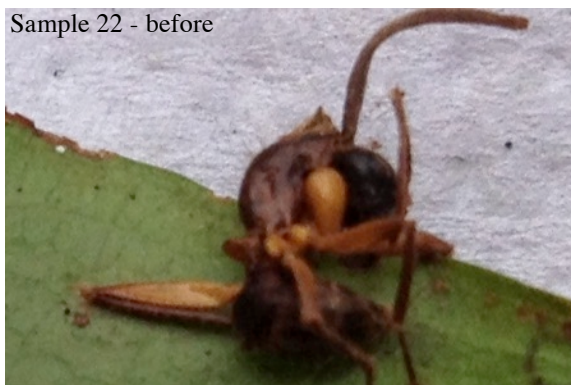

Sample 22 - after

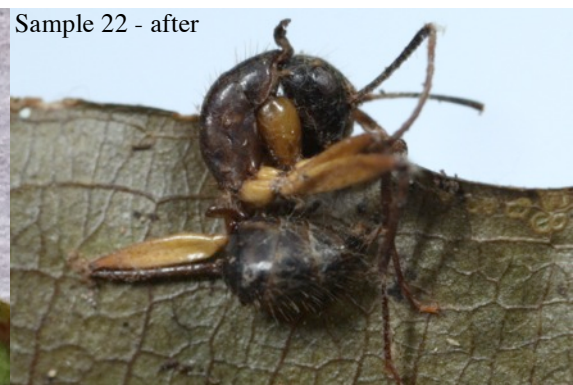

Sample 23 - before

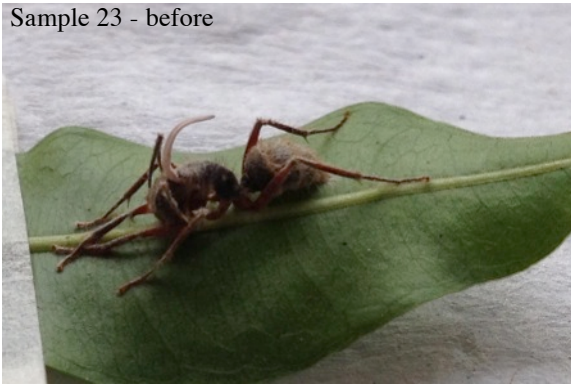

Sample 23 - after

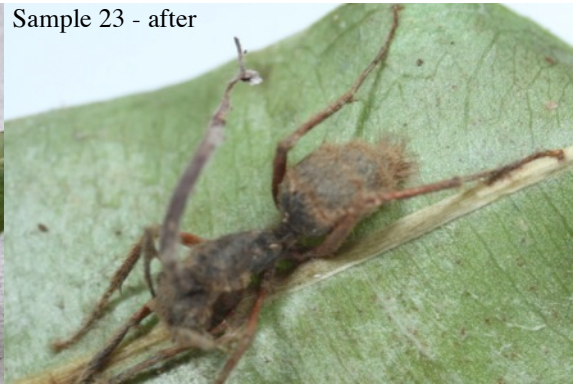

Sample 26 - before

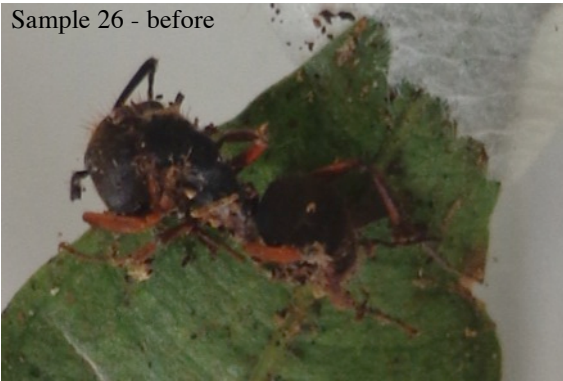

Sample 26 - after

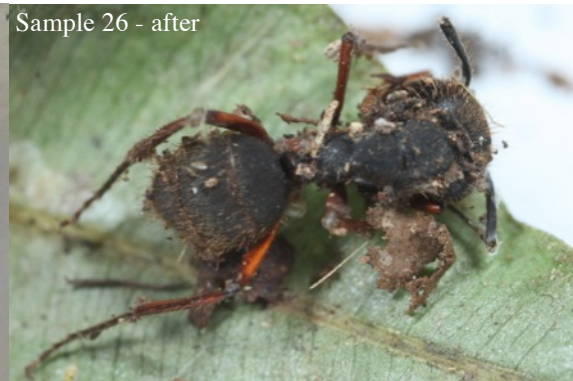

Sample 24 - before

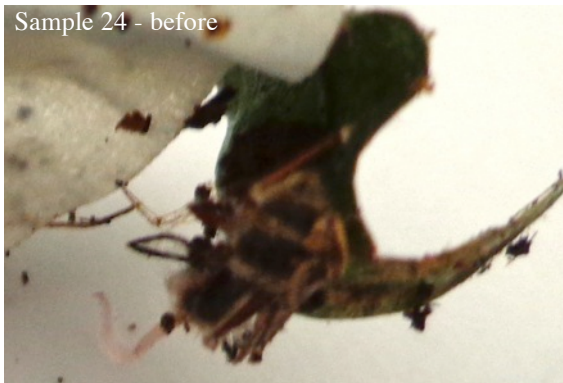

Sample 24 - after

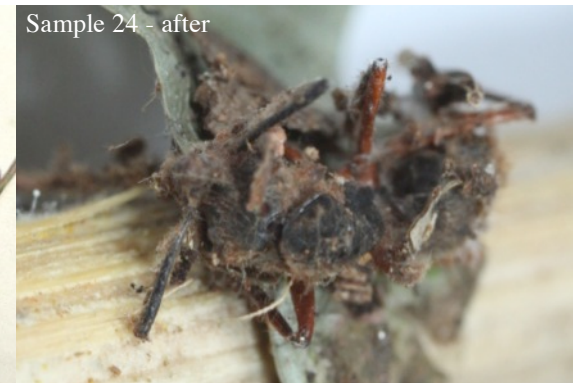

Sample 28 - before

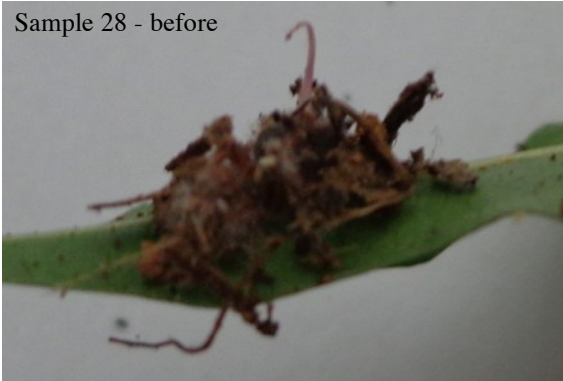

Sample 28 - after

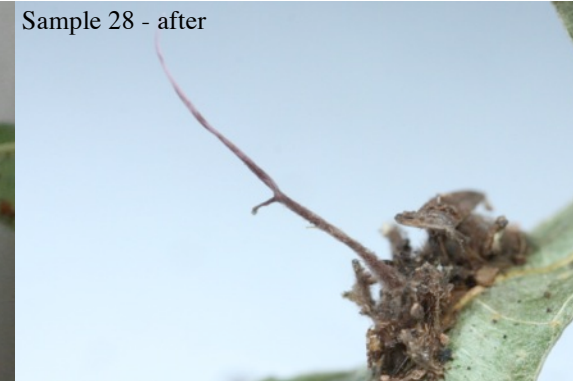

Supplement: pone.0103516.s002.pdf [file pone.0103516.s002.pdf]
