# Supplementary material for: Long-Term Disease Dynamics for a Specialized Parasite of Ant Societies: A Field Study
Source: PubMed Central journal article supplement (PMC4136743; doi:10.1371/journal.pone.0103516), 2014-08-18
Supplement: pone.0103516.s003.pdf [file pone.0103516.s003.pdf]

| ant | x   | y   | z   | month |
|-----|-----|-----|-----|-------|
| 1   | 189 | 9   | 26  | 1     |
| 2   | 61  | 206 | 108 | 1     |
| 3   | 135 | 61  | 17  | 1     |
| 4   | 135 | 240 | 29  | 1     |
| 5   | 61  | 664 | 73  | 1     |
| 6   | 21  | 843 | 22  | 1     |
| 7   | 73  | 917 | 67  | 1     |
| 8   | 218 | 867 | 13  | 1     |
| 9   | 200 | 887 | 29  | 1     |
| 10  | 346 | 831 | 13  | 1     |
| 11  | 331 | 610 | 64  | 1     |
| 12  | 259 | 496 | 54  | 1     |
| 13  | 224 | 387 | 104 | 1     |
| 14  | 253 | 352 | 125 | 1     |
| 15  | 241 | 371 | 29  | 1     |
| 16  | 241 | 372 | 15  | 1     |
| 17  | 222 | 156 | 3   | 1     |
| 18  | 396 | 156 | 15  | 1     |
| 19  | 258 | 59  | 78  | 1     |
| 20  | 434 | 157 | 15  | 1     |
| 21  | 590 | 173 | 24  | 1     |
| 22  | 536 | 286 | 97  | 1     |
| 23  | 508 | 375 | 92  | 1     |
| 24  | 558 | 500 | 104 | 1     |
| 25  | 430 | 580 | 17  | 1     |
| 26  | 600 | 841 | 94  | 1     |
| 27  | 772 | 940 | 10  | 1     |
| 28  | 787 | 643 | 29  | 1     |
| 29  | 741 | 731 | 122 | 1     |
| 30  | 710 | 604 | 19  | 1     |
| 31  | 600 | 723 | 110 | 1     |
| 32  | 800 | 731 | 61  | 1     |
| 33  | 662 | 402 | 108 | 1     |
| 34  | 660 | 275 | 148 | 1     |
| 35  | 795 | 278 | 19  | 1     |
| 36  | 609 | 69  | 55  | 1     |
| 37  | 837 | 156 | 16  | 1     |
| 38  | 846 | 22  | 66  | 1     |
| 39  | 944 | 135 | 11  | 1     |
| 40  | 918 | 200 | 115 | 1     |
| 41  | 840 | 377 | 29  | 1     |
| 42  | 872 | 744 | 30  | 1     |
| 43  | 172 | 140 | 32  | 1     |
| 44  | 152 | 104 | 14  | 1     |
| 45  | 117 | 500 | 93  | 1     |
| 46  | 140 | 662 | 15  | 1     |
| 47  | 177 | 933 | 155 | 1     |

|    |      |     |     |   |
|----|------|-----|-----|---|
| 48 | 41   | 906 | 112 | 1 |
| 49 | 334  | 200 | 23  | 1 |
| 50 | 288  | 28  | 6   | 1 |
| 51 | 394  | 154 | 128 | 1 |
| 52 | 348  | 393 | 51  | 1 |
| 53 | 305  | 452 | 13  | 1 |
| 54 | 318  | 550 | 100 | 1 |
| 55 | 222  | 691 | 16  | 1 |
| 56 | 508  | 986 | 113 | 1 |
| 57 | 542  | 809 | 38  | 1 |
| 58 | 528  | 826 | 23  | 1 |
| 59 | 502  | 724 | 135 | 1 |
| 60 | 547  | 551 | 16  | 1 |
| 61 | 547  | 546 | 20  | 1 |
| 62 | 400  | 572 | 26  | 1 |
| 63 | 432  | 447 | 56  | 1 |
| 64 | 502  | 253 | 131 | 1 |
| 65 | 461  | 215 | 27  | 1 |
| 66 | 430  | 186 | 16  | 1 |
| 67 | 489  | 40  | 22  | 1 |
| 68 | 632  | 45  | 81  | 1 |
| 69 | 607  | 19  | 58  | 1 |
| 70 | 589  | 21  | 82  | 1 |
| 71 | 776  | 237 | 100 | 1 |
| 72 | 774  | 283 | 142 | 1 |
| 73 | 713  | 648 | 29  | 1 |
| 74 | 662  | 495 | 38  | 1 |
| 75 | 759  | 905 | 30  | 1 |
| 76 | 980  | 850 | 34  | 1 |
| 77 | 983  | 782 | 14  | 1 |
| 78 | 1000 | 588 | 132 | 1 |
| 79 | 912  | 322 | 11  | 1 |
| 80 | 880  | 143 | 38  | 1 |
| 81 | 859  | 147 | 27  | 1 |
| 82 | 168  | 64  | 31  | 1 |
| 83 | 152  | 55  | 34  | 1 |
| 84 | 154  | 122 | 19  | 1 |
| 85 | 190  | 187 | 21  | 1 |
| 86 | 71   | 243 | 50  | 1 |
| 87 | 93   | 375 | 32  | 1 |
| 88 | 75   | 409 | 18  | 1 |
| 89 | 115  | 430 | 116 | 1 |
| 90 | 12   | 499 | 52  | 1 |
| 91 | 160  | 508 | 18  | 1 |
| 92 | 0    | 655 | 117 | 1 |
| 93 | 200  | 683 | 20  | 1 |
| 94 | 200  | 680 | 12  | 1 |
| 95 | 295  | 870 | 110 | 1 |

|     |     |     |     |   |
|-----|-----|-----|-----|---|
| 96  | 360 | 973 | 40  | 1 |
| 97  | 263 | 663 | 33  | 1 |
| 98  | 317 | 682 | 23  | 1 |
| 99  | 311 | 682 | 36  | 1 |
| 100 | 419 | 460 | 12  | 1 |
| 101 | 560 | 520 | 69  | 1 |
| 102 | 446 | 902 | 21  | 1 |
| 103 | 793 | 870 | 35  | 1 |
| 104 | 739 | 600 | 99  | 1 |
| 105 | 757 | 525 | 19  | 1 |
| 106 | 726 | 555 | 102 | 1 |
| 107 | 687 | 425 | 40  | 1 |
| 108 | 632 | 413 | 41  | 1 |
| 109 | 629 | 216 | 99  | 1 |
| 110 | 697 | 337 | 38  | 1 |
| 111 | 614 | 59  | 58  | 1 |
| 112 | 692 | 31  | 79  | 1 |
| 113 | 978 | 188 | 104 | 1 |
| 114 | 993 | 170 | 69  | 1 |
| 115 | 994 | 658 | 29  | 1 |
| 116 | 987 | 906 | 16  | 1 |
| 117 | 190 | 22  | 119 | 1 |
| 118 | 174 | 104 | 143 | 1 |
| 119 | 105 | 137 | 115 | 1 |
| 120 | 200 | 924 | 123 | 1 |
| 121 | 372 | 0   | 91  | 1 |
| 122 | 327 | 113 | 80  | 1 |
| 123 | 258 | 84  | 41  | 1 |
| 124 | 293 | 86  | 28  | 1 |
| 125 | 362 | 215 | 52  | 1 |
| 126 | 268 | 283 | 46  | 1 |
| 127 | 244 | 263 | 31  | 1 |
| 128 | 238 | 263 | 19  | 1 |
| 129 | 366 | 518 | 54  | 1 |
| 130 | 200 | 411 | 122 | 1 |
| 131 | 266 | 553 | 24  | 1 |
| 132 | 297 | 858 | 102 | 1 |
| 133 | 237 | 889 | 18  | 1 |
| 134 | 268 | 981 | 29  | 1 |
| 135 | 433 | 990 | 75  | 1 |
| 136 | 507 | 610 | 90  | 1 |
| 137 | 468 | 490 | 36  | 1 |
| 138 | 417 | 200 | 86  | 1 |
| 139 | 564 | 94  | 98  | 1 |
| 140 | 683 | 185 | 110 | 1 |
| 141 | 701 | 224 | 98  | 1 |
| 142 | 766 | 298 | 123 | 1 |
| 143 | 628 | 800 | 69  | 1 |

|     |     |     |     |   |
|-----|-----|-----|-----|---|
| 144 | 659 | 895 | 49  | 1 |
| 145 | 864 | 335 | 46  | 1 |
| 146 | 964 | 68  | 144 | 1 |
| 147 | 165 | 886 | 45  | 2 |
| 148 | 161 | 879 | 19  | 2 |
| 149 | 173 | 909 | 131 | 2 |
| 150 | 152 | 908 | 101 | 2 |
| 151 | 248 | 892 | 17  | 2 |
| 152 | 377 | 737 | 33  | 2 |
| 153 | 316 | 629 | 30  | 2 |
| 154 | 380 | 252 | 27  | 2 |
| 155 | 389 | 28  | 86  | 2 |
| 156 | 460 | 419 | 31  | 2 |
| 157 | 435 | 771 | 31  | 2 |
| 158 | 511 | 764 | 23  | 2 |
| 159 | 612 | 724 | 22  | 2 |
| 160 | 617 | 721 | 20  | 2 |
| 161 | 631 | 78  | 60  | 2 |
| 162 | 996 | 21  | 49  | 2 |
| 163 | 810 | 326 | 91  | 2 |
| 164 | 906 | 524 | 16  | 2 |
| 165 | 902 | 519 | 15  | 2 |
| 166 | 992 | 562 | 11  | 2 |
| 167 | 933 | 546 | 74  | 2 |
| 168 | 165 | 886 | 45  | 2 |
| 169 | 161 | 879 | 19  | 2 |
| 170 | 173 | 909 | 131 | 2 |
| 171 | 152 | 908 | 101 | 2 |
| 172 | 248 | 892 | 17  | 2 |
| 173 | 377 | 737 | 33  | 2 |
| 174 | 316 | 629 | 30  | 2 |
| 175 | 380 | 252 | 27  | 2 |
| 176 | 389 | 28  | 86  | 2 |
| 177 | 460 | 419 | 31  | 2 |
| 178 | 435 | 771 | 31  | 2 |
| 179 | 511 | 764 | 23  | 2 |
| 180 | 612 | 724 | 22  | 2 |
| 181 | 617 | 721 | 20  | 2 |
| 182 | 631 | 78  | 60  | 2 |
| 183 | 996 | 21  | 49  | 2 |
| 184 | 810 | 326 | 91  | 2 |
| 185 | 906 | 524 | 16  | 2 |
| 186 | 902 | 519 | 15  | 2 |
| 187 | 992 | 562 | 11  | 2 |
| 188 | 933 | 546 | 74  | 2 |
| 189 | 156 | 79  | 33  | 2 |
| 190 | 189 | 785 | 14  | 2 |
| 191 | 142 | 922 | 22  | 2 |

|     |     |     |     |   |
|-----|-----|-----|-----|---|
| 192 | 135 | 830 | 41  | 2 |
| 193 | 330 | 464 | 23  | 2 |
| 194 | 222 | 583 | 17  | 2 |
| 195 | 261 | 382 | 62  | 2 |
| 196 | 243 | 260 | 31  | 2 |
| 197 | 258 | 290 | 10  | 2 |
| 198 | 420 | 351 | 22  | 2 |
| 199 | 579 | 448 | 27  | 2 |
| 200 | 428 | 996 | 102 | 2 |
| 201 | 653 | 390 | 51  | 2 |
| 202 | 600 | 381 | 48  | 2 |
| 203 | 702 | 128 | 56  | 2 |
| 204 | 817 | 6   | 16  | 2 |
| 205 | 826 | 785 | 94  | 2 |
| 206 | 873 | 817 | 90  | 2 |
| 207 | 909 | 856 | 38  | 2 |
| 208 | 917 | 848 | 36  | 2 |
| 209 | 97  | 182 | 70  | 2 |
| 210 | 34  | 464 | 52  | 2 |
| 211 | 69  | 639 | 16  | 2 |
| 212 | 65  | 723 | 131 | 2 |
| 213 | 343 | 929 | 70  | 2 |
| 214 | 335 | 944 | 13  | 2 |
| 215 | 270 | 387 | 86  | 2 |
| 216 | 226 | 328 | 20  | 2 |
| 217 | 229 | 234 | 94  | 2 |
| 218 | 335 | 219 | 110 | 2 |
| 219 | 239 | 8   | 140 | 2 |
| 220 | 272 | 1   | 41  | 2 |
| 221 | 261 | 0   | 43  | 2 |
| 222 | 551 | 292 | 64  | 2 |
| 223 | 532 | 294 | 30  | 2 |
| 224 | 462 | 469 | 29  | 2 |
| 225 | 441 | 518 | 71  | 2 |
| 226 | 437 | 746 | 124 | 2 |
| 227 | 935 | 177 | 26  | 2 |
| 228 | 818 | 43  | 48  | 2 |
| 229 | 852 | 668 | 106 | 2 |
| 230 | 82  | 191 | 141 | 3 |
| 231 | 25  | 880 | 87  | 3 |
| 232 | 105 | 882 | 33  | 3 |
| 233 | 366 | 829 | 47  | 3 |
| 234 | 235 | 848 | 62  | 3 |
| 235 | 378 | 769 | 123 | 3 |
| 236 | 207 | 277 | 155 | 3 |
| 237 | 212 | 405 | 17  | 3 |
| 238 | 262 | 180 | 29  | 3 |
| 239 | 259 | 78  | 59  | 3 |

|     |     |     |     |   |
|-----|-----|-----|-----|---|
| 240 | 434 | 97  | 59  | 3 |
| 241 | 821 | 400 | 19  | 3 |
| 242 | 903 | 737 | 73  | 3 |
| 243 | 857 | 624 | 13  | 3 |
| 244 | 923 | 866 | 21  | 3 |
| 245 | 200 | 77  | 106 | 3 |
| 246 | 387 | 159 | 147 | 3 |
| 247 | 960 | 372 | 73  | 3 |
| 248 | 974 | 479 | 6   | 3 |
| 249 | 421 | 24  | 54  | 3 |
| 250 | 609 | 924 | 140 | 3 |
| 251 | 913 | 74  | 69  | 3 |
| 252 | 25  | 960 | 67  | 3 |
| 253 | 747 | 676 | 118 | 3 |
| 254 | 89  | 276 | 16  | 4 |
| 255 | 637 | 698 | 91  | 4 |
| 256 | 925 | 830 | 41  | 4 |
| 257 | 850 | 435 | 75  | 4 |
| 258 | 968 | 291 | 135 | 4 |
| 259 | 800 | 153 | 29  | 4 |
| 260 | 915 | 112 | 24  | 4 |
| 261 | 802 | 282 | 22  | 4 |
| 262 | 84  | 139 | 45  | 4 |
| 263 | 466 | 200 | 134 | 4 |
| 264 | 517 | 313 | 65  | 4 |
| 265 | 806 | 296 | 96  | 4 |
| 266 | 76  | 63  | 29  | 5 |
| 267 | 116 | 574 | 36  | 5 |
| 268 | 113 | 660 | 157 | 5 |
| 269 | 153 | 980 | 57  | 5 |
| 270 | 13  | 843 | 45  | 5 |
| 271 | 79  | 951 | 34  | 5 |
| 272 | 239 | 629 | 106 | 5 |
| 273 | 304 | 703 | 87  | 5 |
| 274 | 297 | 564 | 149 | 5 |
| 275 | 223 | 400 | 64  | 5 |
| 276 | 256 | 0   | 57  | 5 |
| 277 | 534 | 57  | 26  | 5 |
| 278 | 514 | 277 | 94  | 5 |
| 279 | 543 | 300 | 144 | 5 |
| 280 | 530 | 257 | 76  | 5 |
| 281 | 429 | 856 | 35  | 5 |
| 282 | 421 | 732 | 126 | 5 |
| 283 | 390 | 720 | 71  | 5 |
| 284 | 686 | 974 | 108 | 5 |
| 285 | 857 | 105 | 43  | 5 |
| 286 | 828 | 430 | 56  | 5 |
| 287 | 27  | 400 | 34  | 5 |

|     |     |     |     |   |
|-----|-----|-----|-----|---|
| 288 | 181 | 683 | 111 | 5 |
| 289 | 226 | 849 | 136 | 5 |
| 290 | 271 | 414 | 35  | 5 |
| 291 | 539 | 734 | 25  | 5 |
| 292 | 575 | 658 | 101 | 5 |
| 293 | 717 | 298 | 135 | 5 |
| 294 | 800 | 345 | 79  | 5 |
| 295 | 115 | 67  | 21  | 5 |
| 296 | 383 | 873 | 23  | 5 |
| 297 | 445 | 72  | 21  | 5 |
| 298 | 655 | 97  | 120 | 5 |
| 299 | 91  | 849 | 58  | 5 |
| 300 | 720 | 891 | 67  | 5 |
| 301 | 46  | 23  | 75  | 5 |
| 302 | 107 | 394 | 146 | 5 |
| 303 | 117 | 454 | 30  | 5 |
| 304 | 21  | 910 | 13  | 5 |
| 305 | 258 | 940 | 63  | 5 |
| 306 | 400 | 348 | 130 | 5 |
| 307 | 876 | 579 | 92  | 5 |
| 308 | 69  | 138 | 108 | 6 |
| 309 | 78  | 600 | 88  | 6 |
| 310 | 451 | 284 | 80  | 6 |
| 311 | 450 | 635 | 82  | 6 |
| 312 | 440 | 626 | 83  | 6 |
| 313 | 609 | 690 | 94  | 6 |
| 314 | 676 | 645 | 44  | 6 |
| 315 | 714 | 836 | 19  | 6 |
| 316 | 664 | 881 | 88  | 6 |
| 317 | 758 | 903 | 51  | 6 |
| 318 | 781 | 957 | 90  | 6 |
| 319 | 678 | 800 | 94  | 6 |
| 320 | 815 | 400 | 67  | 6 |
| 321 | 175 | 166 | 130 | 6 |
| 322 | 400 | 516 | 78  | 6 |
| 323 | 467 | 254 | 11  | 6 |
| 324 | 521 | 450 | 37  | 6 |
| 325 | 724 | 870 | 20  | 6 |
| 326 | 682 | 832 | 48  | 6 |
| 327 | 809 | 660 | 99  | 6 |
| 328 | 313 | 695 | 58  | 6 |
| 329 | 282 | 696 | 55  | 6 |
| 330 | 278 | 37  | 21  | 6 |
| 331 | 445 | 903 | 14  | 6 |
| 332 | 655 | 878 | 43  | 6 |
| 333 | 823 | 586 | 27  | 6 |
| 334 | 132 | 506 | 14  | 6 |
| 335 | 120 | 626 | 16  | 6 |

|     |     |      |     |    |
|-----|-----|------|-----|----|
| 336 | 235 | 1000 | 47  | 6  |
| 337 | 228 | 523  | 93  | 6  |
| 338 | 187 | 400  | 72  | 6  |
| 339 | 182 | 410  | 58  | 6  |
| 340 | 435 | 174  | 102 | 6  |
| 341 | 418 | 583  | 81  | 6  |
| 342 | 488 | 552  | 112 | 6  |
| 343 | 427 | 986  | 88  | 6  |
| 344 | 763 | 911  | 122 | 6  |
| 345 | 780 | 267  | 87  | 6  |
| 346 | 845 | 149  | 35  | 6  |
| 347 | 867 | 400  | 31  | 6  |
| 348 | 85  | 917  | 89  | 14 |
| 349 | 676 | 703  | 79  | 14 |
| 350 | 283 | 431  | 37  | 14 |
| 351 | 238 | 154  | 36  | 14 |
| 352 | 627 | 124  | 162 | 14 |
| 353 | 784 | 168  | 53  | 14 |
| 354 | 845 | 86   | 19  | 14 |
| 355 | 884 | 353  | 18  | 14 |
| 356 | 851 | 290  | 48  | 14 |
| 357 | 852 | 283  | 33  | 14 |
| 358 | 871 | 394  | 24  | 14 |
| 359 | 800 | 411  | 14  | 14 |
| 360 | 881 | 460  | 22  | 14 |
| 361 | 909 | 857  | 41  | 14 |
| 362 | 154 | 891  | 131 | 14 |
| 363 | 284 | 978  | 53  | 14 |
| 364 | 373 | 721  | 121 | 14 |
| 365 | 460 | 989  | 68  | 14 |
| 366 | 387 | 600  | 78  | 14 |
| 367 | 251 | 544  | 127 | 14 |
| 368 | 209 | 182  | 37  | 14 |
| 369 | 545 | 179  | 55  | 14 |
| 370 | 509 | 242  | 104 | 14 |
| 371 | 470 | 757  | 45  | 14 |
| 372 | 417 | 625  | 21  | 14 |
| 373 | 701 | 852  | 23  | 14 |
| 374 | 695 | 591  | 8   | 14 |
| 375 | 612 | 416  | 18  | 14 |
| 376 | 150 | 898  | 34  | 14 |
| 377 | 226 | 421  | 80  | 14 |
| 378 | 516 | 731  | 34  | 14 |
| 379 | 503 | 878  | 25  | 14 |
| 380 | 672 | 989  | 49  | 14 |
| 381 | 743 | 108  | 46  | 14 |
| 382 | 274 | 529  | 12  | 14 |
| 383 | 282 | 552  | 25  | 14 |



|     |     |     |    |    |
|-----|-----|-----|----|----|
| 384 | 390 | 64  | 49 | 14 |
| 385 | 353 | 99  | 82 | 14 |
| 386 | 963 | 114 | 99 | 14 |
